# Supplementary material for: The efficacy and safety of S-1-based regimens in the first-line treatment of advanced gastric cancer: a systematic review and meta-analysis
Source: PubMed Central journal article supplement (PMC4906062; doi:10.1007/s10120-015-0587-8), 2016-01-11
Supplement: 10120_2015_587_MOESM3_ESM.pdf [file 10120_2015_587_MOESM3_ESM.pdf]

**Supplementary Figure S2. Risk of bias assessment.**

**A Overall Survival**

|                | Random sequence generation (selection bias) | Allocation concealment (selection bias) | Blinding of outcome assessment (detection bias) | Incomplete outcome data (attrition bias) | Selective reporting (reporting bias) | Other bias |
|----------------|---------------------------------------------|-----------------------------------------|-------------------------------------------------|------------------------------------------|--------------------------------------|------------|
| Ajani 2013     | ?                                           | ?                                       | +                                               | +                                        | +                                    | +          |
| Ajani 2015     | ?                                           | ?                                       | +                                               | +                                        | +                                    | ?          |
| Boku 2009      | +                                           | +                                       | +                                               | +                                        | +                                    | +          |
| Huang 2012     | ?                                           | ?                                       | +                                               | +                                        | +                                    | +          |
| Jin 2008       | +                                           | +                                       | +                                               | +                                        | +                                    | ?          |
| Kim 2012       | +                                           | +                                       | +                                               | +                                        | +                                    | +          |
| Kobayashi 2015 | ?                                           | ?                                       | +                                               | +                                        | +                                    | ?          |
| Koizumi 2008   | +                                           | +                                       | +                                               | +                                        | +                                    | +          |
| Koizumi 2014   | ?                                           | ?                                       | +                                               | +                                        | +                                    | +          |
| Komatsu 2011   | +                                           | +                                       | +                                               | +                                        | +                                    | +          |
| Lee 2008       | +                                           | +                                       | +                                               | +                                        | +                                    | +          |
| Lu 2014        | +                                           | +                                       | +                                               | +                                        | +                                    | ?          |
| Narahara 2011  | +                                           | +                                       | +                                               | +                                        | +                                    | +          |
| Nishikawa 2012 | +                                           | +                                       | +                                               | +                                        | +                                    | +          |
| Sawaki 2009    | ?                                           | ?                                       | +                                               | +                                        | +                                    | ?          |
| Wang 2013      | +                                           | +                                       | +                                               | +                                        | +                                    | ?          |
| Xu 2013        | ?                                           | ?                                       | +                                               | +                                        | +                                    | ?          |
| Yamaguchi 2014 | ?                                           | ?                                       | +                                               | +                                        | +                                    | ?          |

**B Progression Free Survival and Objective Response Rate**

|                | Random sequence generation (selection bias) | Allocation concealment (selection bias) | Blinding of outcome assessment (detection bias) | Incomplete outcome data (attrition bias) | Selective reporting (reporting bias) | Other bias |
|----------------|---------------------------------------------|-----------------------------------------|-------------------------------------------------|------------------------------------------|--------------------------------------|------------|
| Ajani 2013     | ?                                           | ?                                       | +                                               | +                                        | +                                    | +          |
| Ajani 2015     | ?                                           | ?                                       | ?                                               | +                                        | +                                    | ?          |
| Boku 2009      | +                                           | +                                       | +                                               | +                                        | +                                    | +          |
| Huang 2012     | ?                                           | ?                                       | ?                                               | +                                        | +                                    | +          |
| Jin 2008       | +                                           | +                                       | +                                               | +                                        | +                                    | ?          |
| Kim 2012       | +                                           | +                                       | ?                                               | +                                        | +                                    | +          |
| Kobayashi 2015 | ?                                           | ?                                       | +                                               | +                                        | +                                    | ?          |
| Koizumi 2008   | +                                           | +                                       | +                                               | +                                        | +                                    | +          |
| Koizumi 2014   | ?                                           | ?                                       | +                                               | +                                        | +                                    | +          |
| Komatsu 2011   | +                                           | +                                       | +                                               | +                                        | +                                    | +          |
| Lee 2008       | +                                           | +                                       | +                                               | +                                        | +                                    | +          |
| Lu 2014        | +                                           | +                                       | ?                                               | +                                        | +                                    | ?          |
| Narahara 2011  | +                                           | +                                       | +                                               | +                                        | +                                    | +          |
| Nishikawa 2012 | +                                           | +                                       | ?                                               | +                                        | +                                    | +          |
| Sawaki 2009    | ?                                           | ?                                       | ?                                               | +                                        | +                                    | ?          |
| Wang 2013      | +                                           | +                                       | ?                                               | +                                        | +                                    | ?          |
| Xu 2013        | ?                                           | ?                                       | +                                               | +                                        | +                                    | ?          |
| Yamaguchi 2014 | ?                                           | ?                                       | ?                                               | +                                        | +                                    | ?          |
