# Supplementary material for: The efficacy and safety of S-1-based regimens in the first-line treatment of advanced gastric cancer: a systematic review and meta-analysis
Source: PubMed Central journal article supplement (PMC4906062; doi:10.1007/s10120-015-0587-8), 2016-01-11

# Supplementary Figure S3. Funnelplots for assessment of publication bias.

## S-1 based therapy versus 5-FU/Capecitabine based therapy

### A Overall Survival

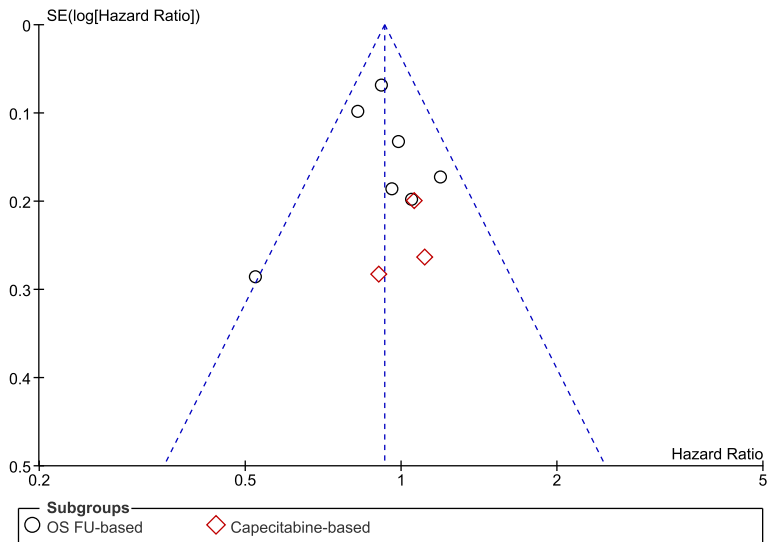

### B Progression Free Survival

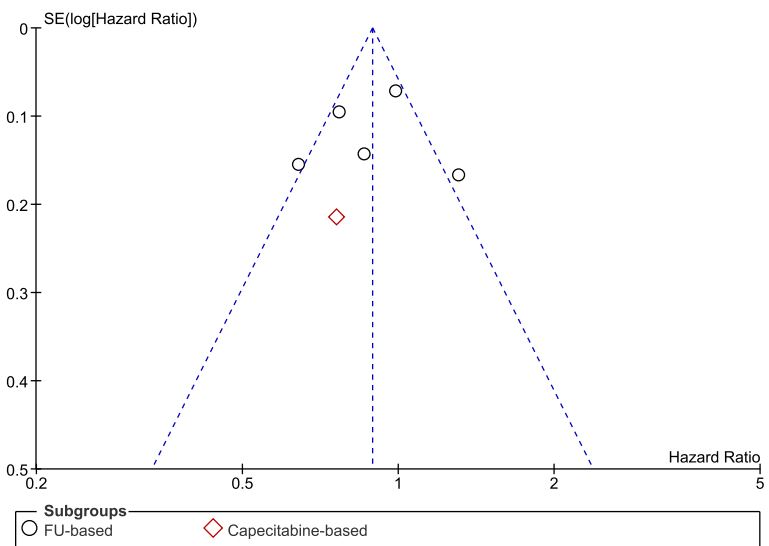

### C Objective Response Rate

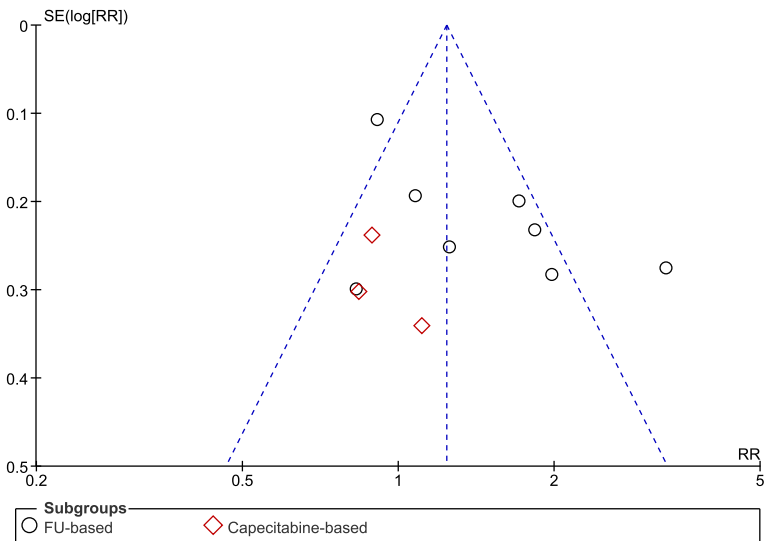

## S-1 combination therapy versus S-1 monotherapy

### D Overall Survival

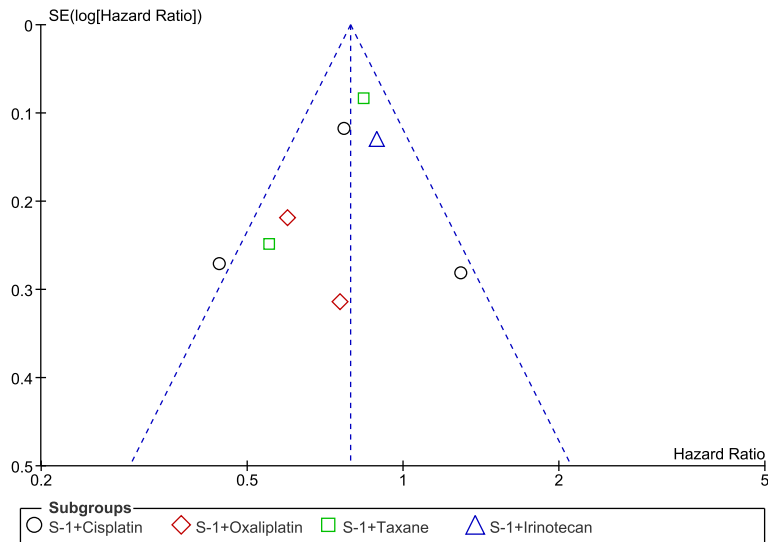

### E Progression Free Survival

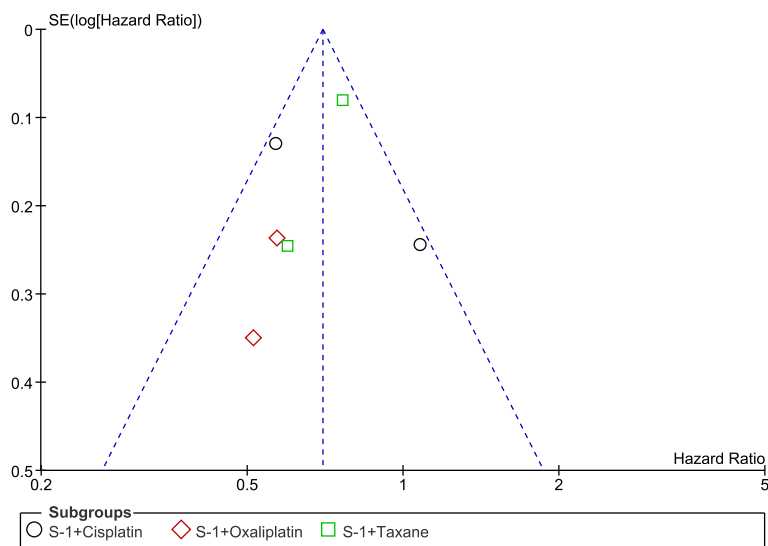

### F Objective Response Rate

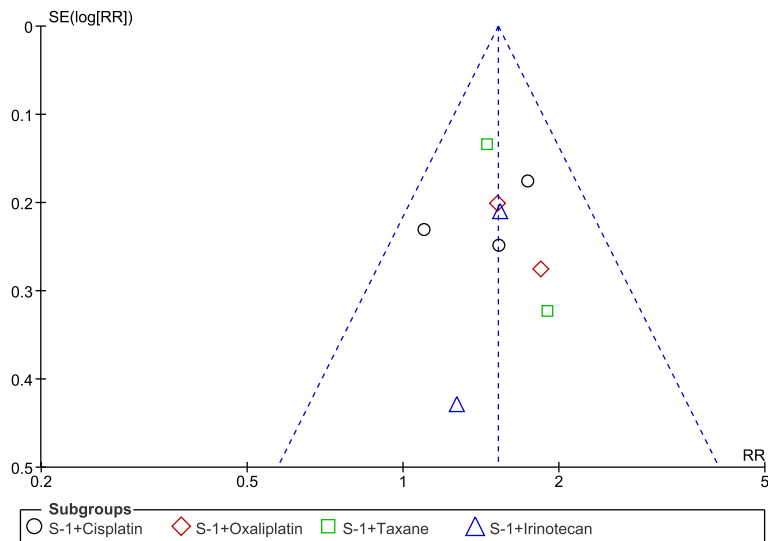

Supplement: 10120_2015_587_MOESM4_ESM.pdf [file 10120_2015_587_MOESM4_ESM.pdf]
